# Supplementary material for: Differences in Responses of Immunosuppressed Kidney Transplant Patients to Moderna mRNA-1273 versus Pfizer-BioNTech
Source: MDPI journal article supplement (doi:10.3390/vaccines12010091), 2024-01-17
Supplement: s1 [file s1]

# 6 Months Post Vaccination

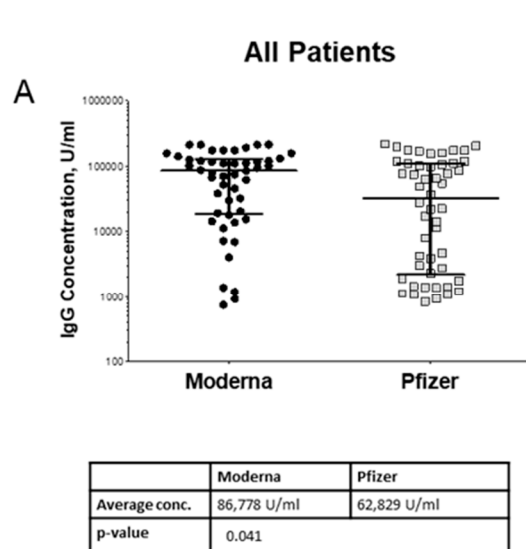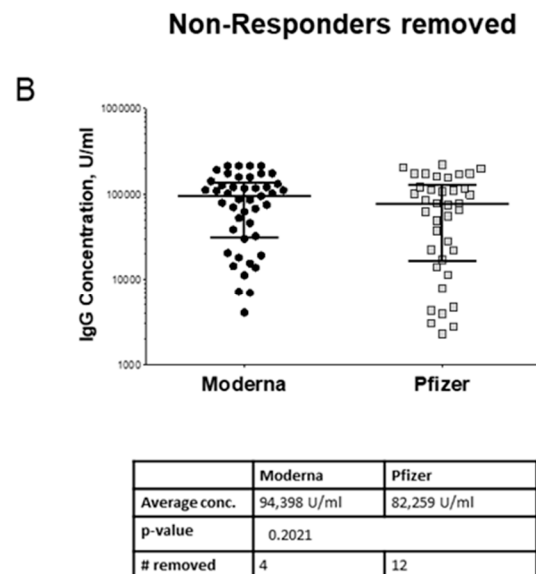

# 12 Months Post Vaccination

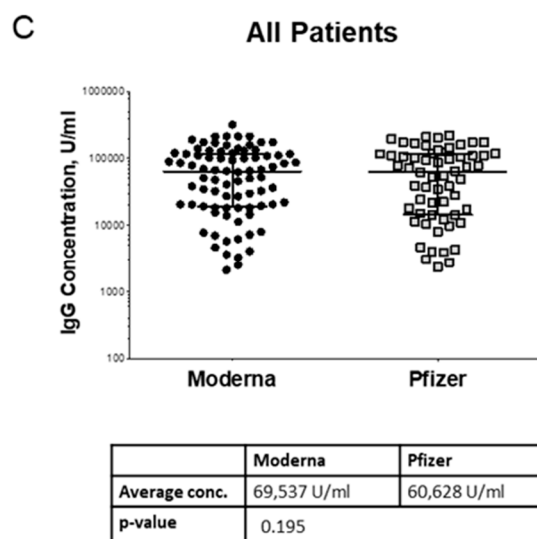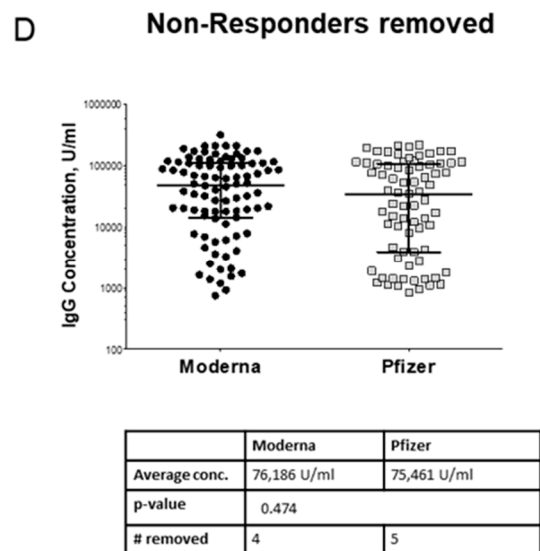

**Figure S1.** Serum IgG levels in transplant recipients vaccinated with the Pfizer or Moderna vaccines in the 6-months (A and B) and 12-months (C and D) cohorts.

Summary of Results of ELISA test for IgA against SARS-CoV-2 N-protein.

| Total tested | Positive | Negative | Unequivocal |
|--------------|----------|----------|-------------|
| 144          | 6        | 136      | 2           |

**Table S1.** Description of the 12 months cohort.

| Variable                        | Moderna    | Pfizer     | p-value* |
|---------------------------------|------------|------------|----------|
| All Participants (n=165)        |            |            |          |
| Race                            |            |            |          |
| Caucasian                       | 68 (75.6%) | 43 (57.3%) | 0.013    |
| Other                           | 22 (24.4%) | 32 (42.7%) |          |
| Race                            |            |            |          |
| African American                | 12 (13.3%) | 23 (30.7%) | 0.007    |
| Other                           | 78 (86.7%) | 52 (69.3%) |          |
| Gender                          |            |            |          |
| Male                            | 45 (50.0%) | 47 (62.7%) | 0.103    |
| Female                          | 45 (50.0%) | 28 (37.3%) |          |
| Age at consent                  |            |            |          |
| 50 or less                      | 34 (53.9%) | 29 (46.1%) | 0.439    |
| 51 or more                      | 53 (54.6%) | 44 (45.4%) |          |
| Unknown                         | 3 (60.0%)  | 2 (40.0%)  |          |
| Age at consent, years (average) | 60.9       | 60.3       | 0.875    |
| Vaccine doses                   |            |            |          |
| 2                               | 59 (65.6%) | 46 (61.3%) | 0.575    |
| + boosting dose                 | 31 (34.4%) | 29 (38.7%) |          |
| Healthy volunteers (n=66)       |            |            |          |
| Race                            |            |            |          |
| Caucasian                       | 29 (74.5%) | 14 (51.9%) | 0.059    |
| Other                           | 10 (25.5%) | 13 (48.1%) |          |
| Race                            |            |            |          |
| African American                | 2 (5.1%)   | 6 (22.2%)  | 0.036    |
| Other                           | 37 (94.9%) | 21 (77.8%) |          |
| Gender                          |            |            |          |
| Male                            | 13 (33.3%) | 13 (48.1%) | 0.226    |
| Female                          | 26 (66.7%) | 14 (51.9%) |          |
| Age at consent                  |            |            |          |
| 35 or less                      | 19 (48.7%) | 17 (63.0%) | 0.253    |
| 36 or more                      | 20 (51.3%) | 10 (37.0%) |          |
| Age at consent, years (average) | 63.8       | 64.2       | 0.968    |
| Vaccine doses                   |            |            |          |
| 2                               | 31 (79.5%) | 17 (63.0%) | 0.138    |
| + boosting dose                 | 8 (20.5%)  | 10 (37.0%) |          |
| Transplant recipients (n=99)    |            |            |          |
| Race                            |            |            |          |
| Caucasian                       | 39 (57.4%) | 29 (42.6%) | 0.085    |
| Other                           | 12 (38.7%) | 19 (61.3%) |          |
| Race                            |            |            |          |
| African American                | 10 (45.5%) | 12 (54.5%) | 0.519    |
| Other                           | 41 (53.2%) | 36 (46.8%) |          |
| Donor type                      |            |            |          |
| Living                          | 8 (61.5%)  | 5 (38.5%)  | 0.438    |
| Deceased                        | 43 (50.0%) | 43 (50.0%) |          |
| Gender                          |            |            |          |
| Male                            | 32 (48.5%) | 34 (51.5%) | 0.394    |

|                     |            |            |       |
|---------------------|------------|------------|-------|
| Female              | 19 (57.6%) | 14 (42.4%) |       |
| BMI                 |            |            |       |
| 29 or less          | 24 (51.1%) | 23 (48.9%) |       |
| 30 or more          | 23 (50.0%) | 23 (50.0%) | 0.918 |
| Unknown             | 4 (66.7%)  | 2 (33.3%)  |       |
| Age at consent      |            |            |       |
| 50 or less          | 15 (55.6%) | 12 (44.4%) |       |
| 50 or more          | 36 (50.0%) | 36 (50.0%) | 0.622 |
| Vaccine doses       |            |            |       |
| 2                   | 28 (49.1%) | 29 (50.9%) |       |
| + boosting dose     | 23 (54.8%) | 19 (45.2%) | 0.579 |
| Antimetabolites use |            |            |       |
| Yes                 | 39 (50.0%) | 39 (50.0%) |       |
| No                  | 8 (50.0%)  | 8 (50.0%)  | 0.62  |
| Unknown             | 4 (80.0%)  | 1 (20.0%)  |       |
| CNI use             |            |            |       |
| Yes                 | 46 (49.5%) | 47 (50.5%) |       |
| No                  | 3 (100.0%) | 0 (0.0%)   | 0.075 |
| Unknown             | 2 (66.7%)  | 1 (33.3%)  |       |
| Prednisone use      |            |            |       |
| Yes                 | 39 (50.6%) | 38 (49.4%) |       |
| No                  | 9 (50.0%)  | 9 (50.0%)  | 0.438 |
| Unknown             | 3 (75.0%)  | 1 (25.0%)  |       |

**Table S2.** Seropositivity for SARS-CoV-2 spike trimer-specific IgG in various groups of study participants in the 6 months cohort.

| Group                                      | Positive   | Negative*  | p-value** |
|--------------------------------------------|------------|------------|-----------|
| Participants at 6 months post vaccination  |            |            |           |
| All Participants                           |            |            |           |
| Healthy Volunteers                         | 20 (74.1%) | 7 (25.9%)  | 0.015     |
| Transplant Recipients                      | 33 (45.8%) | 39 (54.2%) |           |
| All Participants                           |            |            |           |
| Moderna                                    | 30 (61.2%) | 19 (38.8%) | 0.096     |
| Pfizer-BioNTech                            | 23 (46.0%) | 27 (54.0%) |           |
| Transplant Recipients                      |            |            |           |
| Moderna                                    | 19 (51.4%) | 18 (48.6%) | 0.231     |
| Pfizer-BioNTech                            | 14 (40.0%) | 21 (60.0%) |           |
| Healthy Volunteers                         |            |            |           |
| Moderna                                    | 11 (91.7%) | 1 (8.3%)   | 0.062     |
| Pfizer-BioNTech                            | 9 (60.0%)  | 6 (40.0%)  |           |
| Participants at 12 months post vaccination |            |            |           |
| All Participants                           |            |            |           |
| Healthy Volunteers                         | 34 (51.5%) | 32 (48.5%) | 0.041     |
| Transplant Recipients                      | 40 (40.4%) | 59 (59.6%) |           |
| All Participants                           |            |            |           |
| Moderna                                    | 42 (46.7%) | 48 (53.3%) | 0.493     |
| Pfizer-BioNTech                            | 32 (42.7%) | 43 (57.3%) |           |
| Transplant Recipients                      |            |            |           |
| Moderna                                    | 21 (41.2%) | 30 (58.8%) | 0.809     |
| Pfizer-BioNTech                            | 19 (39.5%) | 29 (60.5%) |           |
| Healthy Volunteers                         |            |            |           |
| Moderna                                    | 21 (53.8%) | 18 (46.2%) | 0.5628    |
| Pfizer-BioNTech                            | 13 (48.1%) | 14 (51.9%) |           |

\* "Negative" also includes "Indeterminate". \*\* Chi-squared test.
